# Supplementary material for: Oxidative Stress-Induced Misfolding and Inclusion Formation of Nrf2 and Keap1
Source: MDPI journal article supplement (doi:10.3390/antiox11020243), 2022-01-27
Supplement: s1 [file s1]

## Supplementary Figures

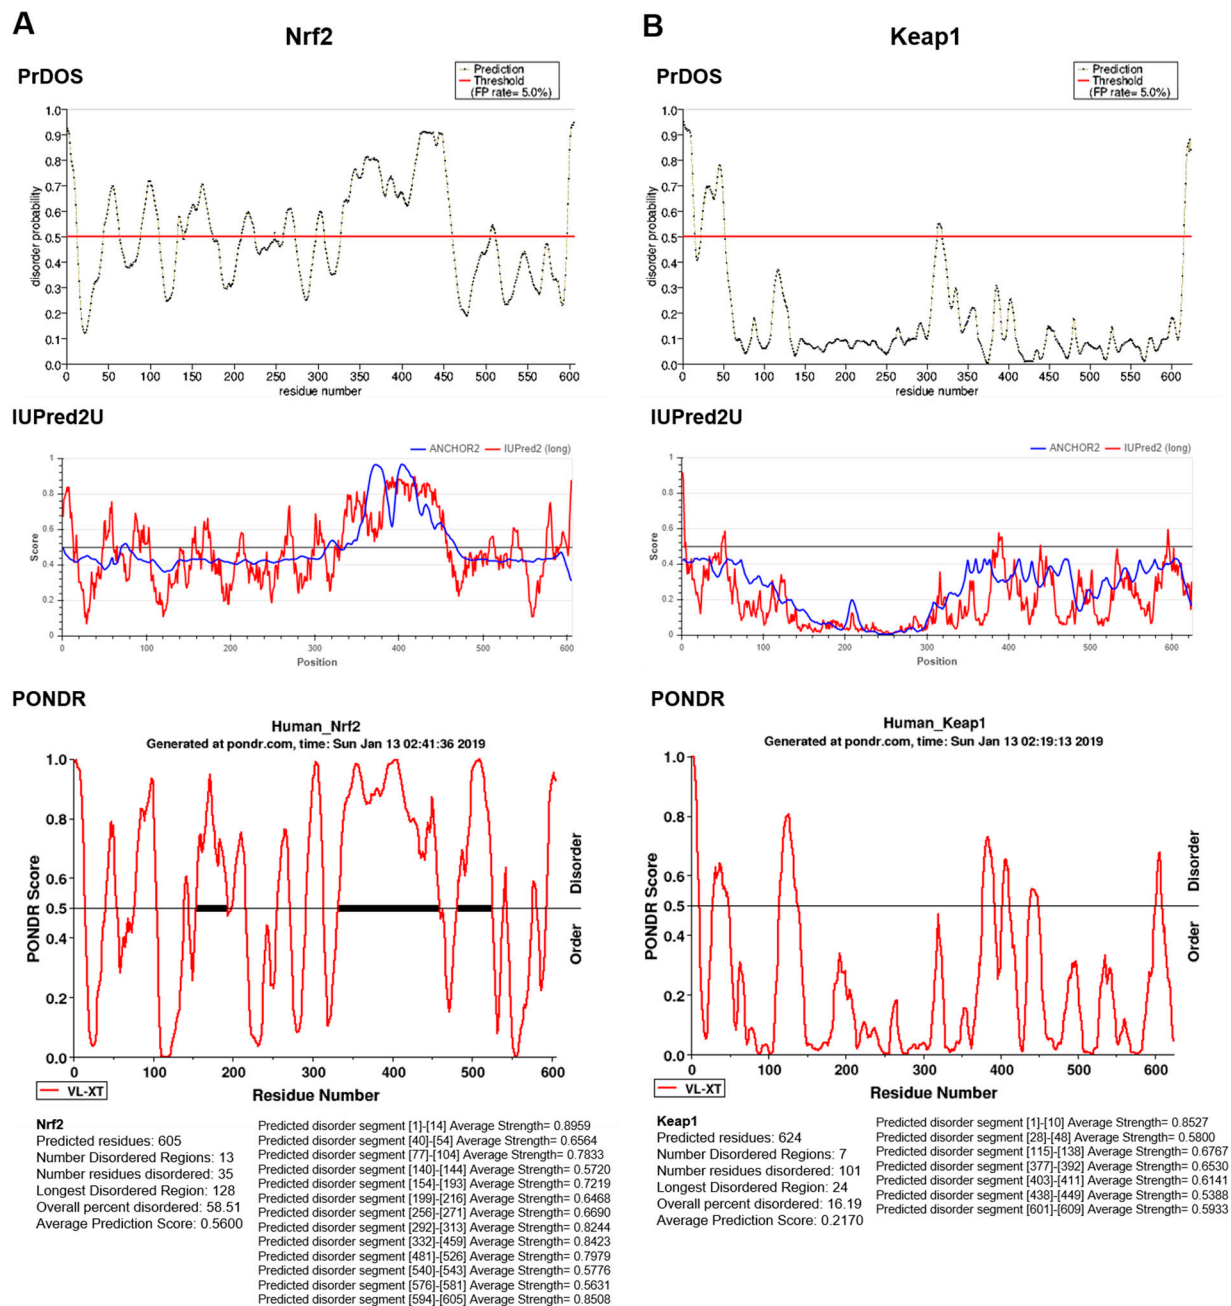

**Figure S1: Individual disordered profile plots for PrDOS, IUPred2U, and PONDR.** Disorder probability prediction graphs for Nrf2 and Keap1 are shown for all three prediction algorithms. A score of >0.5 predicts disorder and a score of <0.5 predicts order.

**Table S1: The 15 species observed in cysteine analysis studies.** The species name, specific name, and UniProt code are shown.

|              | Species        | Specific Name                | UniProt Code |
|--------------|----------------|------------------------------|--------------|
| <b>Nrf2</b>  | Human          | <i>Homo sapiens</i>          | Q16236       |
|              | Chimpanzee     | <i>Pan troglodytes</i>       | H2RAX5       |
|              | Orangutan      | <i>Pongo abelii</i>          | H2P7Y6       |
|              | Rhesus macaque | <i>Macaca mulatta</i>        | F7GPD8       |
|              | Marmoset       | <i>Callithrix jacchus</i>    | F7CLI8       |
|              | Galago         | <i>Otolemur garnettii</i>    | H0Y129       |
|              | Mouse          | <i>Mus musculus</i>          | Q60795       |
|              | Rat            | <i>Rattus norvegicus</i>     | O54968       |
|              | Golden hamster | <i>Mesocricetus auratus</i>  | A0A1U7QFW3   |
|              | Rabbit         | <i>Oryctolagus cuniculus</i> | G1SEJ1       |
|              | Cow            | <i>Bos taurus</i>            | Q5NUA6       |
|              | Bat            | <i>Myotis lucifugus</i>      | G1P184       |
|              | Elephant       | <i>Loxodonta africana</i>    | G3TGN3       |
|              | Chicken        | <i>Gallus gallus</i>         | F1P315       |
|              | Zebrafish      | <i>Danio rerio</i>           | Q7ZVI2       |
| <b>Keap1</b> | Human          | <i>Homo sapiens</i>          | Q14145       |
|              | Chimpanzee     | <i>Pan troglodytes</i>       | H2QFB9       |
|              | Orangutan      | <i>Pongo abelii</i>          | Q5R774       |
|              | Rhesus macaque | <i>Macaca mulatta</i>        | G7NL03       |
|              | Marmoset       | <i>Callithrix jacchus</i>    | F7HDW0       |
|              | Galago         | <i>Otolemur garnettii</i>    | H0X799       |
|              | Mouse          | <i>Mus musculus</i>          | Q9Z2X8       |
|              | Golden hamster | <i>Mesocricetus auratus</i>  | A0A1U7R3C2   |
|              | Rat            | <i>Rattus norvegicus</i>     | P57790       |
|              | Rabbit         | <i>Oryctolagus cuniculus</i> | G1SFF4       |
|              | Cow            | <i>Bos taurus</i>            | A7MBG4       |
|              | Bat            | <i>Myotis lucifugus</i>      | G1PRL8       |
|              | Elephant       | <i>Loxodonta africana</i>    | G3TJS6       |
|              | Chicken        | <i>Gallus gallus</i>         | Q5ZL67       |
|              | Zebrafish      | <i>Danio rerio</i>           | E7FB56       |

**Table S2: Yeast oxidative stress gene deletion strains used in this study.** The gene name, protein name, function (obtained from UniProt), and UniProt code are shown.

| Gene        | Protein                                          | Function (UniProt Consortium)                                                                                                                                                                                                                                          | UniProt Code |
|-------------|--------------------------------------------------|------------------------------------------------------------------------------------------------------------------------------------------------------------------------------------------------------------------------------------------------------------------------|--------------|
| <i>BTN2</i> | Protein BTN2                                     | V-SNARE binding protein that facilitates specific protein retrieval from a late endosome to the Golgi. Modulates the rate of arginine uptake. Involved in pH homeostasis.                                                                                              | P53286       |
| <i>CTA1</i> | Peroxisomal catalase A                           | Occurs in almost all aerobically respiring organisms and serves to protect cells from the toxic effects of hydrogen peroxide.                                                                                                                                          | P15202       |
| <i>GLR1</i> | Glutathione reductase                            | Maintains high levels of reduced glutathione in the cytosol.                                                                                                                                                                                                           | P41921       |
| <i>SOD1</i> | Superoxide dismutase [Cu-Zn]                     | Destroys radicals that are normally produced within the cells and which are toxic to biological systems.                                                                                                                                                               | P00445       |
| <i>SOD2</i> | Superoxide dismutase                             | Destroys radicals that are normally produced within the cells and which are toxic to biological systems.                                                                                                                                                               | S4VPL7       |
| <i>UBI4</i> | Polyubiquitin                                    | Becomes conjugated to proteins, marking them for selective degradation via the ubiquitin-26S proteasome system.                                                                                                                                                        | P0CG63       |
| <i>YAP1</i> | AP-1-like transcription factor YAP1              | Transcription activator involved in oxidative stress response and redox homeostasis. Regulates the transcription of genes encoding antioxidant enzymes and components of thiol-reducing pathways.                                                                      | P19880       |
| <i>SNO4</i> | Probable glutathione-independent glyoxalase SNO4 | Catalyzes the conversion of methylglyoxal (MG) to D-lactate in a single glutathione (GSH)-independent step. May play a role in detoxifying endogenously produced glyoxals. Involved in protection against reactive oxygen species (ROS).                               | Q04902       |
| <i>SRX1</i> | Sulfiredoxin                                     | Contributes to oxidative stress resistance by reducing cysteine-sulfinic acid formed under exposure to oxidants in the peroxiredoxin TSA1. May catalyze the reduction in a multi-step process by acting both as a specific phosphotransferase and as thioltransferase. | P36077       |
| <i>TSA1</i> | Peroxiredoxin TSA1                               | Thiol-specific peroxidase catalyzing the reduction of hydrogen peroxide and organic hydroperoxides to water and alcohols, respectively.                                                                                                                                | P34760       |
| <i>TSA2</i> | Peroxiredoxin TSA2                               | Thiol-specific peroxidase catalyzing the reduction of hydrogen peroxide and organic hydroperoxides to water and alcohols, respectively.                                                                                                                                | Q04120       |
| <i>TRX1</i> | Thioredoxin-1                                    | Participates as a hydrogen donor in redox reactions through the reversible oxidation of its active center dithiol to a disulfide, accompanied by the transfer of 2 electrons and 2 protons.                                                                            | P22217       |
| <i>TRX2</i> | Thioredoxin-2                                    | Participates as a hydrogen donor in redox reactions through the reversible oxidation of its active center dithiol to a disulfide, accompanied by the transfer of 2 electrons and 2 protons.                                                                            | P22803       |

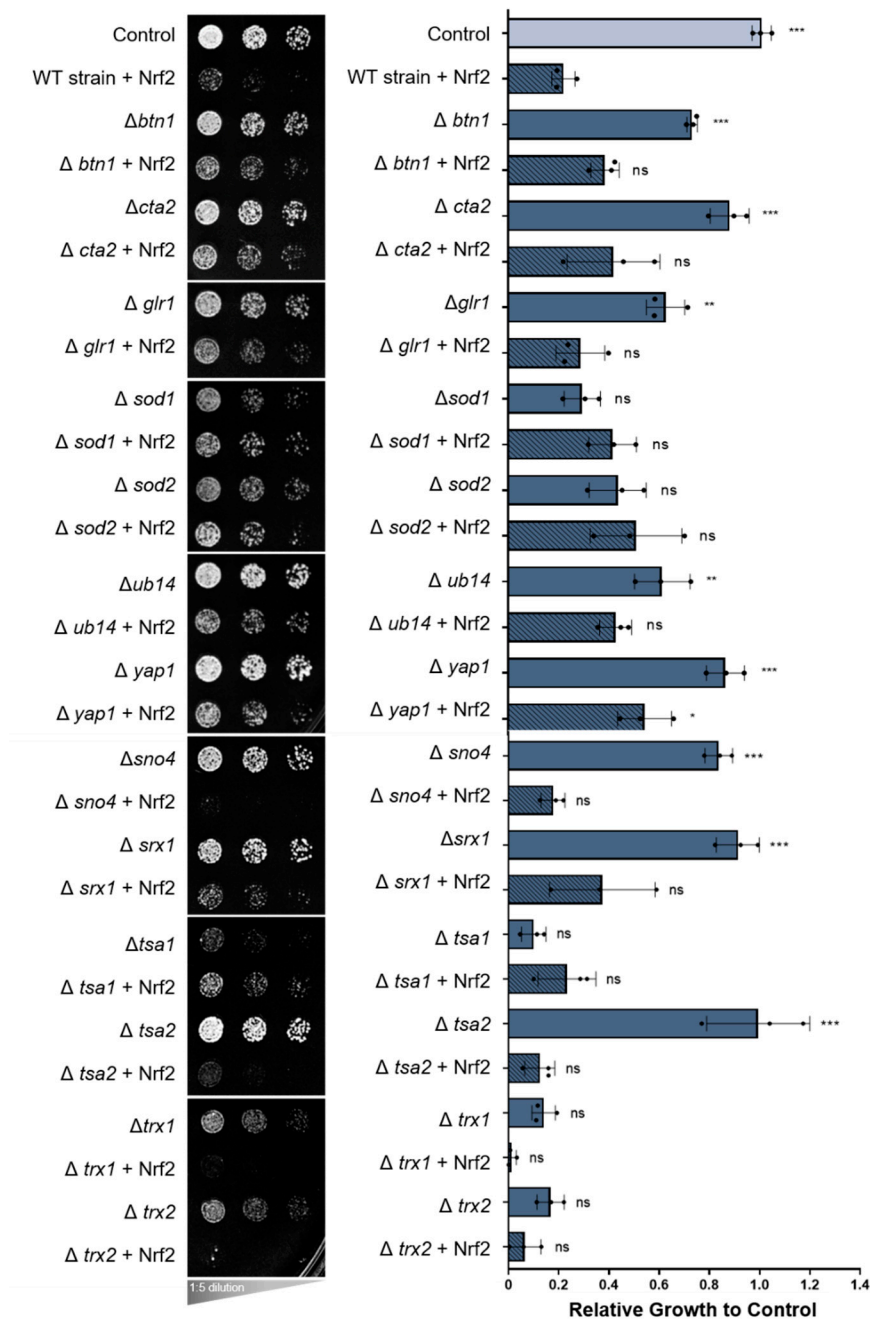

**Figure S2: Full panel of growth assays for Nrf2 expression in yeast oxidative stress deletion strains.** Growth was quantified relative to control. Means derived from three biological replicates were used during analysis. Means were analyzed using one-way ANOVA followed by Tukey's post hoc test. Data are expressed as mean ± SD.  $p < 0.05$  was considered statistically significant; \* $p < 0.05$ , \*\* $p < 0.01$ , \*\*\* $p < 0.001$ .

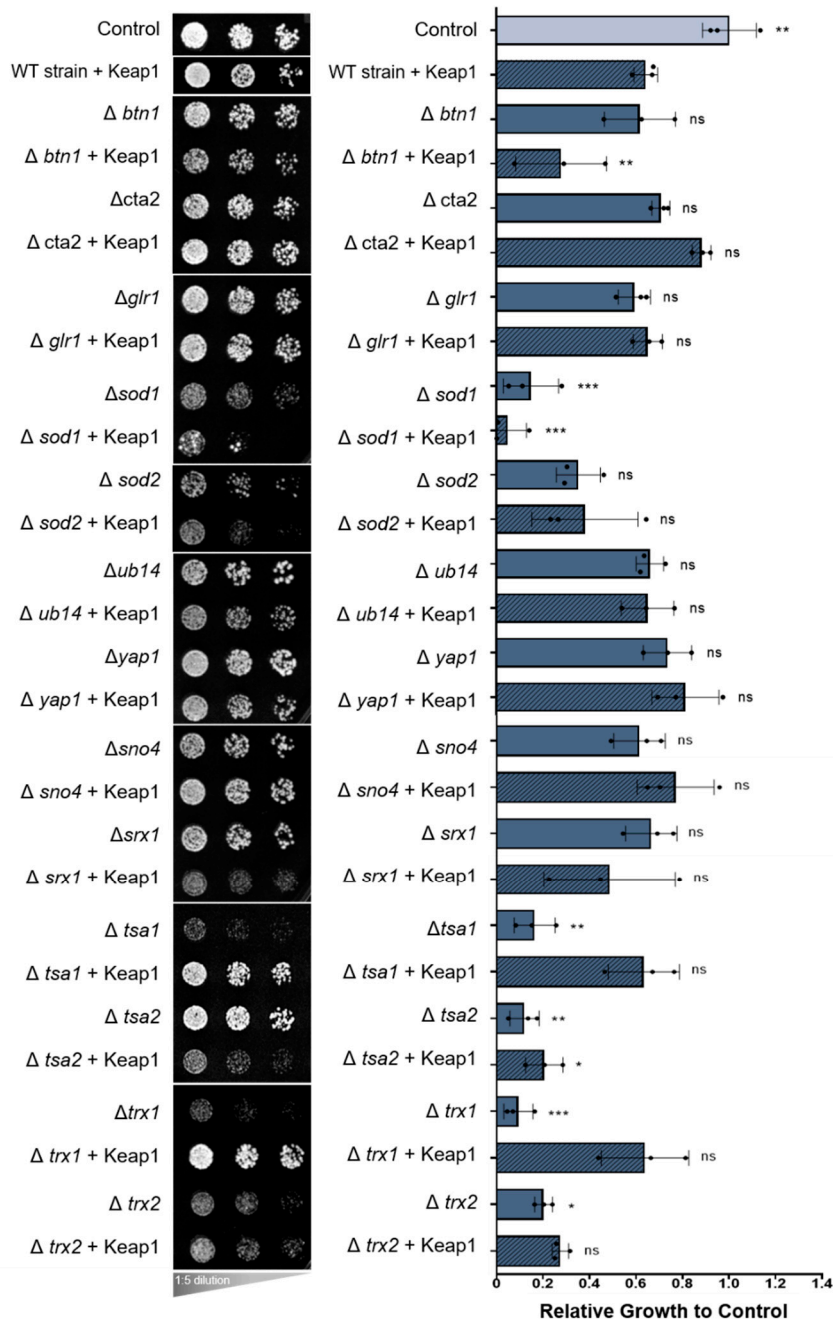

**Figure S3: Full panel of growth assays for Keap1 expression in yeast oxidative stress deletion strains.** Growth was quantified relative to control. Means derived from three biological replicates were used during analysis. Means were analyzed using one-way ANOVA followed by Tukey's post hoc test. Data are expressed as mean  $\pm$  SD.  $p < 0.05$  was considered statistically significant; \*  $p < 0.05$ , \*\*  $p < 0.01$ , \*\*\*  $p < 0.001$ .

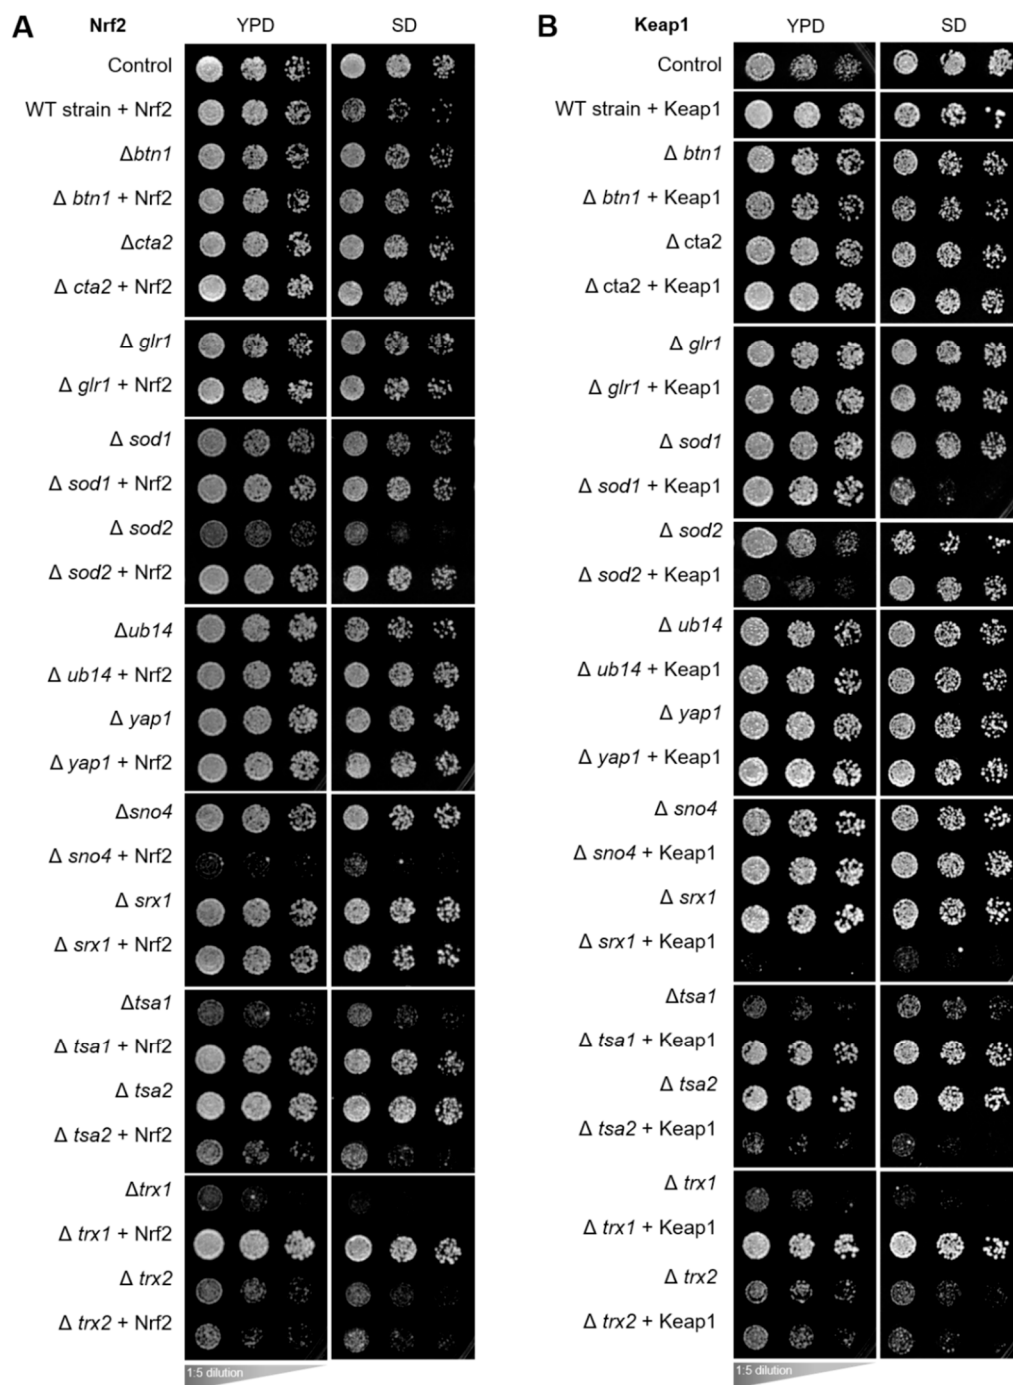

**Figure S4: Growth assay control plates for all yeast oxidative stress deletion studies.** Yeast- extract-peptone-dextrose (YPD) and selective dextrose (SD) control plates are shown for **(A)** Nrf2 and **(B)** Keap1 experiments. Note that some deletions strains harbour an inherent toxic growth phenotype observed even on control media.

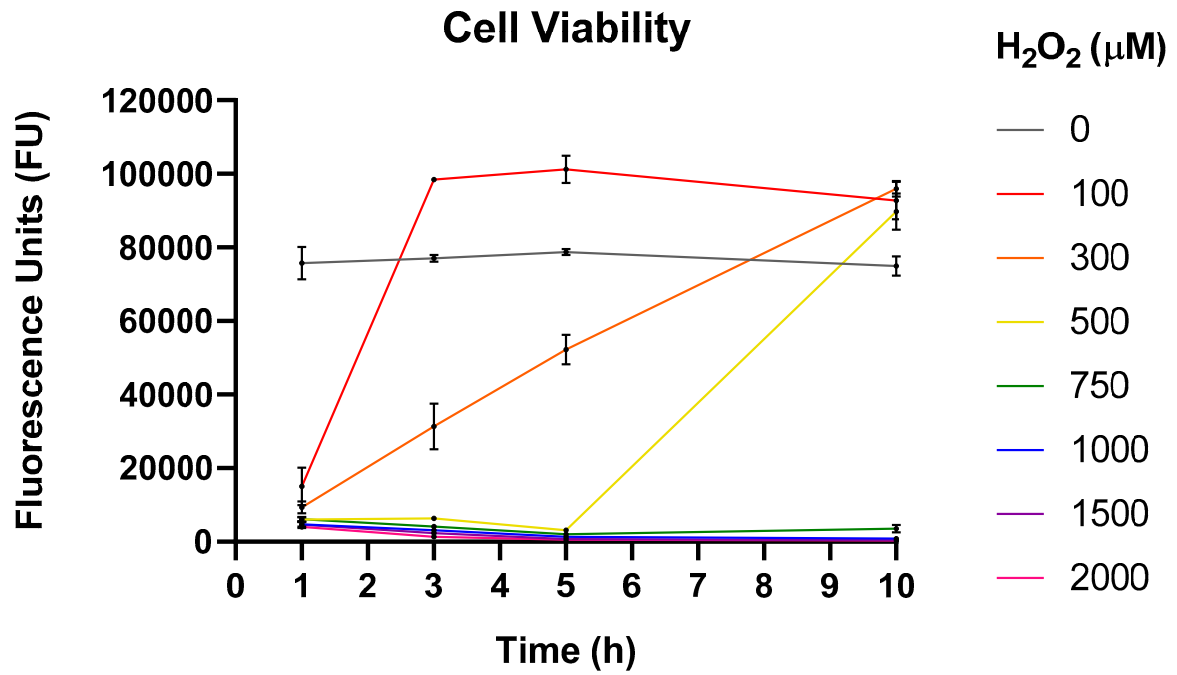

**Figure S5: Optimization of hydrogen peroxide treatment concentration and duration.** Non-transfected HeLa cells were treated with various concentrations of hydrogen peroxide for 1, 3, 5, and 10 h and cell viability was assessed (measured by ATP levels which indicates the presence of metabolically active cells).

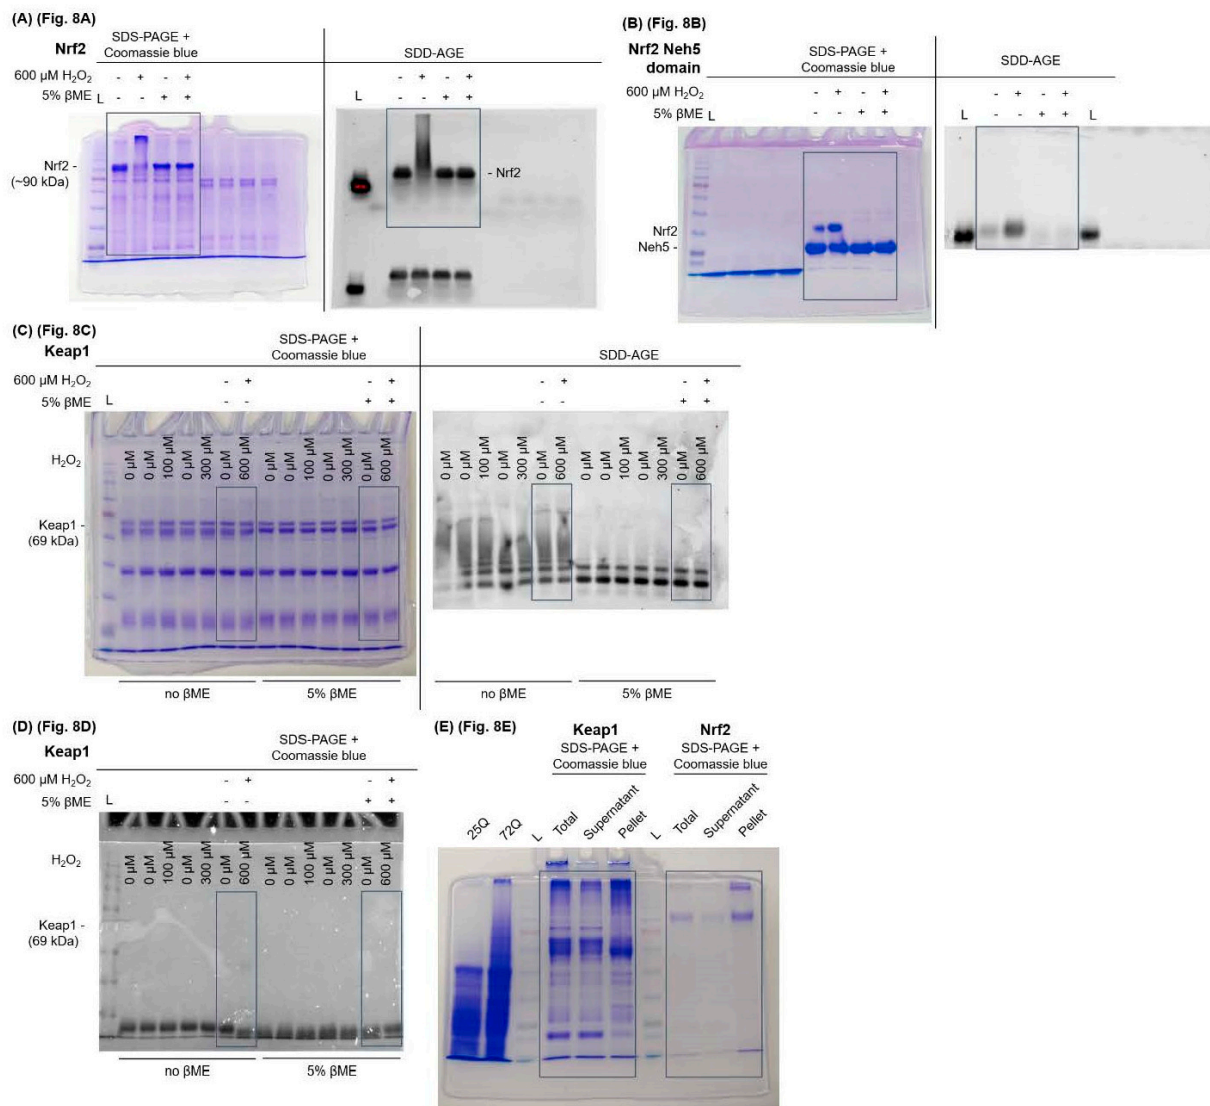

**Figure S6: Full uncropped and unadjusted blots for all Coomassie blue and SDD-AGE experiments in**

**Figure 8.** (A–E) Nrf2 or Keap1 purified protein or protein domains were treated with H<sub>2</sub>O<sub>2</sub>  $\pm$   $\beta$ ME for 30 mins.
